# Supplementary material
Source: MDPI journal article supplement (https://www.mdpi.com/2073-445X/13/2/151)
Supplement: s1 [file s1]

| The list of satellite images used to obtain composite image of the year 1984 |
|------------------------------------------------------------------------------|
|                                                                              |
| Image LANDSAT/LT05/C01/T1_TOA/LT05_175035_19841218 (8 bands)                 |
| Image LANDSAT/LT05/C01/T1_TOA/LT05_176035_19840702 (8 bands)                 |
| Image LANDSAT/LT05/C01/T1_TOA/LT05_176035_19840803 (8 bands)                 |
| Image LANDSAT/LT05/C01/T1_TOA/LT05_176035_19840904 (8 bands)                 |
| Image LANDSAT/LT05/C01/T1_TOA/LT05_176035_19841022 (8 bands)                 |
| Image LANDSAT/LT05/C01/T1_TOA/LT05_175035_19840711 (8 bands)                 |
| Image LANDSAT/LT05/C01/T1_TOA/LT05_175035_19840812 (8 bands)                 |
| Image LANDSAT/LT05/C01/T1_TOA/LT05_176035_19840819 (8 bands)                 |
| Image LANDSAT/LT05/C01/T1_TOA/LT05_176035_19840920 (8 bands)                 |
| Image LANDSAT/LT05/C01/T1_TOA/LT05_176035_19841006 (8 bands)                 |
| Image LANDSAT/LT05/C01/T1_TOA/LT05_175035_19840929 (8 bands)                 |
| Image LANDSAT/LT05/C01/T1_TOA/LT05_176035_19840429 (8 bands)                 |
| Image LANDSAT/LT05/C01/T1_TOA/LT05_176035_19840718 (8 bands)                 |
| Image LANDSAT/LT05/C01/T1_TOA/LT05_176035_19840531 (8 bands)                 |
| Image LANDSAT/LT05/C01/T1_TOA/LT05_175035_19840625 (8 bands)                 |
| Image LANDSAT/LT05/C01/T1_TOA/LT05_175035_19840828 (8 bands)                 |
| Image LANDSAT/LT05/C01/T1_TOA/LT05_176035_19840515 (8 bands)                 |
| Image LANDSAT/LT05/C01/T1_TOA/LT05_175035_19840508 (8 bands)                 |
| Image LANDSAT/LT05/C01/T1_TOA/LT05_175035_19840727 (8 bands)                 |
| Image LANDSAT/LT05/C01/T1_TOA/LT05_175035_19840913 (8 bands)                 |
| Image LANDSAT/LT05/C01/T1_TOA/LT05_175035_19840609 (8 bands)                 |
| Image LANDSAT/LT05/C01/T1_TOA/LT05_175035_19840422 (8 bands)                 |
| Image LANDSAT/LT05/C01/T1_TOA/LT05_176035_19840413 (8 bands)                 |
| Image LANDSAT/LT05/C01/T1_TOA/LT05_176035_19841209 (8 bands)                 |
| Image LANDSAT/LT05/C01/T1_TOA/LT05_175035_19841202 (8 bands)                 |
| Image LANDSAT/LT05/C01/T1_TOA/LT05_176035_19841107 (8 bands)                 |
| Image LANDSAT/LT05/C01/T1_TOA/LT05_175035_19841015 (8 bands)                 |
| Image LANDSAT/LT05/C01/T1_TOA/LT05_175035_19840524 (8 bands)                 |
| Image LANDSAT/LT05/C01/T1_TOA/LT05_176035_19841123 (8 bands)                 |
| Image LANDSAT/LT05/C01/T1_TOA/LT05_175035_19841031 (8 bands)                 |

| The list of satellite images used to obtain composite image of the year 1994 |
|------------------------------------------------------------------------------|
|                                                                              |
| Image LANDSAT/LT05/C01/T1_TOA/LT05_175035_19940621 (8 bands)                 |
| Image LANDSAT/LT05/C01/T1_TOA/LT05_176035_19940628 (8 bands)                 |
| Image LANDSAT/LT05/C01/T1_TOA/LT05_176035_19940831 (8 bands)                 |
| Image LANDSAT/LT05/C01/T1_TOA/LT05_175035_19940520 (8 bands)                 |
| Image LANDSAT/LT05/C01/T1_TOA/LT05_175035_19940605 (8 bands)                 |
| Image LANDSAT/LT05/C01/T1_TOA/LT05_175035_19940909 (8 bands)                 |
| Image LANDSAT/LT05/C01/T1_TOA/LT05_176035_19940815 (8 bands)                 |
| Image LANDSAT/LT05/C01/T1_TOA/LT05_176035_19941002 (8 bands)                 |
| Image LANDSAT/LT05/C01/T1_TOA/LT05_175035_19941112 (8 bands)                 |
| Image LANDSAT/LT05/C01/T1_TOA/LT05_176035_19940527 (8 bands)                 |
| Image LANDSAT/LT05/C01/T1_TOA/LT05_175035_19940925 (8 bands)                 |
| Image LANDSAT/LT05/C01/T1_TOA/LT05_176035_19940119 (8 bands)                 |
| Image LANDSAT/LT05/C01/T1_TOA/LT05_175035_19940301 (8 bands)                 |
| Image LANDSAT/LT05/C01/T1_TOA/LT05_175035_19940824 (8 bands)                 |
| Image LANDSAT/LT05/C01/T1_TOA/LT05_175035_19940707 (8 bands)                 |
| Image LANDSAT/LT05/C01/T1_TOA/LT05_175035_19940723 (8 bands)                 |
| Image LANDSAT/LT05/C01/T1_TOA/LT05_176035_19940730 (8 bands)                 |
| Image LANDSAT/LT05/C01/T1_TOA/LT05_175035_19941011 (8 bands)                 |
| Image LANDSAT/LT05/C01/T1_TOA/LT05_176035_19940409 (8 bands)                 |
| Image LANDSAT/LT05/C01/T1_TOA/LT05_176035_19940714 (8 bands)                 |
| Image LANDSAT/LT05/C01/T1_TOA/LT05_176035_19940612 (8 bands)                 |
| Image LANDSAT/LT05/C01/T1_TOA/LT05_176035_19940308 (8 bands)                 |
| Image LANDSAT/LT05/C01/T1_TOA/LT05_175035_19941027 (8 bands)                 |
| Image LANDSAT/LT05/C01/T1_TOA/LT05_176035_19940916 (8 bands)                 |
| Image LANDSAT/LT05/C01/T1_TOA/LT05_175035_19940504 (8 bands)                 |
| Image LANDSAT/LT05/C01/T1_TOA/LT05_176035_19940220 (8 bands)                 |
| Image LANDSAT/LT05/C01/T1_TOA/LT05_176035_19941205 (8 bands)                 |
| Image LANDSAT/LT05/C01/T1_TOA/LT05_175035_19940808 (8 bands)                 |
| Image LANDSAT/LT05/C01/T1_TOA/LT05_175035_19940317 (8 bands)                 |
| Image LANDSAT/LT05/C01/T1_TOA/LT05_175035_19940402 (8 bands)                 |
| Image LANDSAT/LT05/C01/T1_TOA/LT05_176035_19941018 (8 bands)                 |
| Image LANDSAT/LT05/C01/T1_TOA/LT05_175035_19940213 (8 bands)                 |
| Image LANDSAT/LT05/C01/T1_TOA/LT05_176035_19941221 (8 bands)                 |
| Image LANDSAT/LT05/C01/T1_TOA/LT05_175035_19941214 (8 bands)                 |
| Image LANDSAT/LT05/C01/T1_TOA/LT05_175035_19940112 (8 bands)                 |
| Image LANDSAT/LT05/C01/T1_TOA/LT05_176035_19940103 (8 bands)                 |
| Image LANDSAT/LT05/C01/T1_TOA/LT05_176035_19940425 (8 bands)                 |
| Image LANDSAT/LT05/C01/T1_TOA/LT05_176035_19940204 (8 bands)                 |
| Image LANDSAT/LT05/C01/T1_TOA/LT05_176035_19941103 (8 bands)                 |
| Image LANDSAT/LT05/C01/T1_TOA/LT05_175035_19941128 (8 bands)                 |
| Image LANDSAT/LT05/C01/T1_TOA/LT05_176035_19940511 (8 bands)                 |
| Image LANDSAT/LT05/C01/T1_TOA/LT05_176035_19940324 (8 bands)                 |
| Image LANDSAT/LT05/C01/T1_TOA/LT05_175035_19940128 (8 bands)                 |

| The list of satellite images used to obtain composite image of the year 2004 |            |
|------------------------------------------------------------------------------|------------|
|                                                                              |            |
| Image LANDSAT/LE07/C01/T1_TOA/LE07_175035_20040320                           | (10 bands) |
| Image LANDSAT/LE07/C01/T1_TOA/LE07_175035_20040405                           | (10 bands) |
| Image LANDSAT/LE07/C01/T1_TOA/LE07_175035_20040507                           | (10 bands) |
| Image LANDSAT/LE07/C01/T1_TOA/LE07_176035_20040530                           | (10 bands) |
| Image LANDSAT/LE07/C01/T1_TOA/LE07_176035_20040514                           | (10 bands) |
| Image LANDSAT/LE07/C01/T1_TOA/LE07_176035_20040412                           | (10 bands) |
| Image LANDSAT/LE07/C01/T1_TOA/LE07_175035_20040523                           | (10 bands) |
| Image LANDSAT/LE07/C01/T1_TOA/LE07_176035_20040208                           | (10 bands) |
| Image LANDSAT/LE07/C01/T1_TOA/LE07_176035_20040428                           | (10 bands) |

| The list of satellite images used to obtain composite image of the year 2011 |
|------------------------------------------------------------------------------|
|                                                                              |
| Image LANDSAT/LE07/C01/T1_TOA/LE07_175035_20111002 (10 bands)                |
| Image LANDSAT/LE07/C01/T1_TOA/LE07_175035_20110119 (10 bands)                |
| Image LANDSAT/LE07/C01/T1_TOA/LE07_176035_20111025 (10 bands)                |
| Image LANDSAT/LE07/C01/T1_TOA/LE07_176035_20110806 (10 bands)                |
| Image LANDSAT/LE07/C01/T1_TOA/LE07_176035_20111126 (10 bands)                |
| Image LANDSAT/LE07/C01/T1_TOA/LE07_176035_20111228 (10 bands)                |
| Image LANDSAT/LE07/C01/T1_TOA/LE07_175035_20110511 (10 bands)                |
| Image LANDSAT/LE07/C01/T1_TOA/LE07_176035_20110705 (10 bands)                |
| Image LANDSAT/LE07/C01/T1_TOA/LE07_175035_20110916 (10 bands)                |
| Image LANDSAT/LE07/C01/T1_TOA/LE07_175035_20110730 (10 bands)                |
| Image LANDSAT/LE07/C01/T1_TOA/LE07_176035_20110619 (10 bands)                |
| Image LANDSAT/LE07/C01/T1_TOA/LE07_175035_20110831 (10 bands)                |
| Image LANDSAT/LE07/C01/T1_TOA/LE07_176035_20110721 (10 bands)                |
| Image LANDSAT/LE07/C01/T1_TOA/LE07_175035_20110714 (10 bands)                |
| Image LANDSAT/LE07/C01/T1_TOA/LE07_176035_20110502 (10 bands)                |
| Image LANDSAT/LE07/C01/T1_TOA/LE07_176035_20111110 (10 bands)                |
| Image LANDSAT/LE07/C01/T1_TOA/LE07_175035_20110425 (10 bands)                |
| Image LANDSAT/LE07/C01/T1_TOA/LE07_175035_20110324 (10 bands)                |
| Image LANDSAT/LE07/C01/T1_TOA/LE07_175035_20110612 (10 bands)                |
| Image LANDSAT/LE07/C01/T1_TOA/LE07_176035_20111212 (10 bands)                |
| Image LANDSAT/LE07/C01/T1_TOA/LE07_175035_20110628 (10 bands)                |
| Image LANDSAT/LE07/C01/T1_TOA/LE07_175035_20110409 (10 bands)                |
| Image LANDSAT/LE07/C01/T1_TOA/LE07_175035_20110204 (10 bands)                |
| Image LANDSAT/LE07/C01/T1_TOA/LE07_175035_20111103 (10 bands)                |

| The list of satellite images used to obtain composite image of the year 2022 |  |
|------------------------------------------------------------------------------|--|
|                                                                              |  |
| Image LANDSAT/LC08/C02/T1_TOA/LC08_176035_20220828 (17 bands)                |  |
| Image LANDSAT/LC08/C02/T1_TOA/LC08_175035_20221024 (17 bands)                |  |
| Image LANDSAT/LC08/C02/T1_TOA/LC08_175035_20220330 (17 bands)                |  |
| Image LANDSAT/LC08/C02/T1_TOA/LC08_176035_20220727 (17 bands)                |  |
| Image LANDSAT/LC08/C02/T1_TOA/LC08_176035_20220422 (17 bands)                |  |
| Image LANDSAT/LC08/C02/T1_TOA/LC08_176035_20221218 (17 bands)                |  |
| Image LANDSAT/LC08/C02/T1_TOA/LC08_176035_20220812 (17 bands)                |  |
| Image LANDSAT/LC08/C02/T1_TOA/LC08_176035_20220508 (17 bands)                |  |
| Image LANDSAT/LC08/C02/T1_TOA/LC08_175035_20220720 (17 bands)                |  |
| Image LANDSAT/LC08/C02/T1_TOA/LC08_175035_20220805 (17 bands)                |  |
| Image LANDSAT/LC08/C02/T1_TOA/LC08_175035_20220704 (17 bands)                |  |
| Image LANDSAT/LC08/C02/T1_TOA/LC08_176035_20220929 (17 bands)                |  |
| Image LANDSAT/LC08/C02/T1_TOA/LC08_176035_20220524 (17 bands)                |  |
| Image LANDSAT/LC08/C02/T1_TOA/LC08_176035_20220625 (17 bands)                |  |
| Image LANDSAT/LC08/C02/T1_TOA/LC08_176035_20220711 (17 bands)                |  |
| Image LANDSAT/LC08/C02/T1_TOA/LC08_176035_20220406 (17 bands)                |  |
| Image LANDSAT/LC08/C02/T1_TOA/LC08_175035_20220618 (17 bands)                |  |
| Image LANDSAT/LC08/C02/T1_TOA/LC08_176035_20220913 (17 bands)                |  |
| Image LANDSAT/LC08/C02/T1_TOA/LC08_176035_20220116 (17 bands)                |  |
| Image LANDSAT/LC08/C02/T1_TOA/LC08_176035_20220609 (17 bands)                |  |
| Image LANDSAT/LC08/C02/T1_TOA/LC08_175035_20220906 (17 bands)                |  |
| Image LANDSAT/LC08/C02/T1_TOA/LC08_175035_20221227 (17 bands)                |  |
| Image LANDSAT/LC08/C02/T1_TOA/LC08_175035_20220109 (17 bands)                |  |
| Image LANDSAT/LC08/C02/T1_TOA/LC08_175035_20220821 (17 bands)                |  |
| Image LANDSAT/LC08/C02/T1_TOA/LC08_176035_20221031 (17 bands)                |  |
| Image LANDSAT/LC08/C02/T1_TOA/LC08_175035_20220314 (17 bands)                |  |
| Image LANDSAT/LC08/C02/T1_TOA/LC08_175035_20220517 (17 bands)                |  |
| Image LANDSAT/LC08/C02/T1_TOA/LC08_175035_20221008 (17 bands)                |  |
| Image LANDSAT/LC08/C02/T1_TOA/LC08_175035_20220602 (17 bands)                |  |
| Image LANDSAT/LC08/C02/T1_TOA/LC08_175035_20220210 (17 bands)                |  |
| Image LANDSAT/LC08/C02/T1_TOA/LC08_176035_20221202 (17 bands)                |  |
| Image LANDSAT/LC08/C02/T1_TOA/LC08_176035_20221116 (17 bands)                |  |
| Image LANDSAT/LC08/C02/T1_TOA/LC08_176035_20220305 (17 bands)                |  |
| Image LANDSAT/LC08/C02/T1_TOA/LC08_176035_20221015 (17 bands)                |  |
| Image LANDSAT/LC08/C02/T1_TOA/LC08_175035_20220501 (17 bands)                |  |
| Image LANDSAT/LC08/C02/T1_TOA/LC08_175035_20220226 (17 bands)                |  |
| Image LANDSAT/LC08/C02/T1_TOA/LC08_175035_20220922 (17 bands)                |  |
| Image LANDSAT/LC08/C02/T1_TOA/LC08_175035_20221125 (17 bands)                |  |
| Image LANDSAT/LC08/C02/T1_TOA/LC08_176035_20220217 (17 bands)                |  |
| Image LANDSAT/LC08/C02/T1_TOA/LC08_175035_20221211 (17 bands)                |  |
| Image LANDSAT/LC08/C02/T1_TOA/LC08_175035_20221109 (17 bands)                |  |
| Image LANDSAT/LC08/C02/T1_TOA/LC08_175035_20220415 (17 bands)                |  |
| Image LANDSAT/LC08/C02/T1_TOA/LC08_176035_20220201 (17 bands)                |  |
| Image LANDSAT/LC08/C02/T1_TOA/LC08_176035_20220321 (17 bands)                |  |
