# Supplementary material
Source: MDPI journal article supplement (https://www.mdpi.com/2073-445X/13/2/151)
Supplement: s1 [file s1]

# Western Coastline of Mersin

## Transfer matrices for the study periods

|      |            | 1994       |            |         |         |         |         |
|------|------------|------------|------------|---------|---------|---------|---------|
|      |            | Artificial | Vegetation | Forest  | Water   | Total   | LOSS    |
| 1984 | Artificial | 118.62     | 118.71     | 10.35   | -       | 247.68  | 129.06  |
|      | Vegetation | 125.91     | 3833.91    | 699.3   | -       | 4659.12 | 825.21  |
|      | Forest     | 1.89       | 368.82     | 1240.74 | 11.34   | 1622.79 | 382.05  |
|      | Water      | -          | -          | 24.12   | 5360.04 | 5384.16 | 24.12   |
|      | Total      | 246.42     | 4321.44    | 1974.51 | 5371.38 |         |         |
|      | GAIN       | 127.8      | 487.53     | 733.77  | 11.34   |         |         |
|      |            | 2004       |            |         |         |         |         |
|      |            | Artificial | Vegetation | Forest  | Water   | Total   | LOSS    |
| 1994 | Artificial | 97.83      | 145.17     | 3.42    | -       | 246.42  | 148.59  |
|      | Vegetation | 173.7      | 2410.56    | 1737.18 | -       | 4321.44 | 1910.88 |
|      | Forest     | 23.94      | 243.36     | 1665.99 | 41.22   | 1974.51 | 308.52  |
|      | Water      | -          | -          | 19.62   | 5351.76 | 5371.38 | 19.62   |
|      | Total      | 295.47     | 2799.09    | 3426.21 | 5392.98 |         |         |
|      | GAIN       | 197.64     | 388.53     | 1760.22 | 41.22   |         |         |
|      |            | 2011       |            |         |         |         |         |
|      |            | Artificial | Vegetation | Forest  | Water   | Total   | LOSS    |
| 2004 | Artificial | 233.91     | 61.02      | 0.54    | -       | 295.47  | 61.56   |
|      | Vegetation | 176.31     | 2165.58    | 457.2   | -       | 2799.09 | 633.51  |
|      | Forest     | 18.09      | 882.27     | 2491.65 | 34.2    | 3426.21 | 934.56  |
|      | Water      | -          | -          | 31.59   | 5361.39 | 5392.98 | 31.59   |
|      | Total      | 428.31     | 3108.87    | 2980.98 | 5395.59 |         |         |
|      | GAIN       | 194.4      | 943.29     | 489.33  | 34.2    |         |         |
|      |            | 2022       |            |         |         |         |         |
|      |            | Artificial | Vegetation | Forest  | Water   | Total   | LOSS    |
| 2011 | Artificial | 323.55     | 102.24     | 2.52    | -       | 428.31  | 104.76  |
|      | Vegetation | 324.54     | 1976.13    | 808.2   | -       | 3108.87 | 1132.74 |
|      | Forest     | 60.48      | 581.13     | 2313.63 | 25.74   | 2980.98 | 667.35  |
|      | Water      | -          | 0.09       | 30.51   | 5364.99 | 5395.59 | 30.51   |
|      | Total      | 708.57     | 2659.59    | 3154.86 | 5390.73 |         |         |
|      | GAIN       | 385.02     | 683.46     | 841.23  | 25.74   |         |         |

# Kızılkalesi

## Transfer matrices for the study periods

|      |            | 1994       |            |        |        |        |       |
|------|------------|------------|------------|--------|--------|--------|-------|
|      |            | Artificial | Vegetation | Forest | Water  | Total  | LOSS  |
| 1984 | Artificial | 2.61       | 5.76       | -      | -      | 8.37   | 5.76  |
|      | Vegetation | 4.50       | 84.24      | 10.35  | -      | 99.09  | 14.85 |
|      | Forest     | 4.05       | 6.84       | 41.04  | 2.34   | 54.27  | 13.23 |
|      | Water      | -          | -          | 1.71   | 144.9  | 146.61 | 1.71  |
|      | Total      | 11.16      | 96.84      | 53.1   | 147.24 |        |       |
|      | GAIN       | 8.55       | 12.6       | 12.06  | 2.34   |        |       |
|      |            | 2004       |            |        |        |        |       |
|      |            | Artificial | Vegetation | Forest | Water  | Total  | LOSS  |
| 1994 | Artificial | 9.81       | 1.35       | -      | -      | 11.16  | 1.35  |
|      | Vegetation | 20.07      | 60.3       | 16.47  | -      | 96.84  | 36.54 |
|      | Forest     | 2.61       | 10.8       | 35.73  | 3.96   | 53.1   | 17.37 |
|      | Water      | -          | -          | 5.31   | 141.93 | 147.24 | 5.31  |
|      | Total      | 32.49      | 72.45      | 57.51  | 145.89 |        |       |
|      | GAIN       | 22.68      | 12.15      | 21.78  | 3.96   |        |       |
|      |            | 2011       |            |        |        |        |       |
|      |            | Artificial | Vegetation | Forest | Water  | Total  | LOSS  |
| 2004 | Artificial | 28.62      | 3.87       | -      | -      | 32.49  | 3.87  |
|      | Vegetation | 13.41      | 48.87      | 10.17  | -      | 72.45  | 23.58 |
|      | Forest     | 1.17       | 13.86      | 39.96  | 2.52   | 57.51  | 17.55 |
|      | Water      | -          | -          | 4.86   | 141.03 | 145.89 | 4.86  |
|      | Total      | 43.2       | 66.6       | 54.99  | 143.55 |        |       |
|      | GAIN       | 14.58      | 17.73      | 15.03  | 2.52   |        |       |
|      |            | 2022       |            |        |        |        |       |
|      |            | Artificial | Vegetation | Forest | Water  | Total  | LOSS  |
| 2011 | Artificial | 38.07      | 5.04       | 0.09   | -      | 43.2   | 5.13  |
|      | Vegetation | 13.77      | 35.37      | 17.46  | -      | 66.6   | 31.23 |
|      | Forest     | 1.53       | 7.47       | 42.21  | 3.78   | 54.99  | 12.78 |
|      | Water      | -          | 0.09       | 1.62   | 141.84 | 143.55 | 1.62  |
|      | Total      | 53.37      | 47.97      | 61.38  | 145.62 |        |       |
|      | GAIN       | 15.3       | 12.6       | 19.17  | 3.78   |        |       |
